# Supplementary material for: The Influence of Maternal-Foetal Parameters on Concentrations of Zonulin and Calprotectin in the Blood and Stool of Healthy Newborns during the First Seven Days of Life. An Observational Prospective Cohort Study
Source: PubMed Central journal article supplement (PMC6517987; doi:10.3390/jcm8040473), 2019-04-07
Supplement: jcm-08-00473-s001.pdf [file jcm-08-00473-s001.pdf]

Supplementary Materials: **The influence of maternal-foetal parameters on concentrations of zonulin and calprotectin in the blood and stool of healthy newborns during the first seven days of life. An observational prospective cohort study.**

**Supplemental Table 1.** Zonulin concentrations (ZON, ng/ml) in women: overweight, with obesity and underweight.

| BMI before pregnancy        | ≤18.5                         | >18.5                         |                  |
|-----------------------------|-------------------------------|-------------------------------|------------------|
|                             | Median<br>(range)             | Median<br>(range)             | p/r              |
| ZON in meconium             | 56.42 (1.93-148.24)n=8        | 51.05 (1.36-700.65)<br>n=43   | 0.595/<br>0.07   |
| ZON in newborn stool        | 132.07 (61.36-337.0)<br>n=8   | 115.28 (29.38-593.72)<br>n=58 | 0.992/<br>-0.001 |
| ZON in umbilical-cord serum | 11.83 (6.86-35.74)<br>n=12    | 11.14 (5.82-52.34)<br>n=65    | 0.710/<br>-0.04  |
| ZON in maternal serum       | 26.89 (12.07-42.25)<br>n=10   | 20.31 (6.39-57.54)<br>n=66    | 0.279/<br>-0.12  |
| ZON in maternal stool       | 94.95 (57.25-153.17)<br>n=4   | 81.60 (42.52-225.74)<br>n=24  | 0.870/<br>-0.03  |
| BMI before pregnancy        | ≤25                           | >25                           |                  |
| ZON in meconium             | 48.01 (1.36-289.20)<br>n=37   | 61.77 (10.72-700.65)<br>n=14  | 0.454<br>-0.10   |
| ZON in stool                | 109.36 (52.42-505.51)<br>n=43 | 128.37 (29.38-593.72)<br>n=23 | 0.463/<br>-0.09  |
| ZON in umbilical-cord serum | 10.72 (5.82-52.34)<br>n=55    | 12.87 (5.96-36.57)<br>n=22    | 0.107/<br>-0.18  |
| ZON in maternal serum       | 21.37 (6.39-57.54)<br>n=55    | 21.95 (10.26-44.90)<br>n=21   | 0.857/<br>-0.02  |
| ZON in maternal stool       | 76.59 (42.52-225.74)<br>n=19  | 106.09 (48.20-208.20)<br>n=9  | 0.302/<br>-0.20  |
| BMI before pregnancy        | ≤30                           | >30                           |                  |
| ZON in meconium             | 69.95 (12.88-122.11)<br>n=47  | 51.05 (1.36-700.65)<br>n=4    | 0.713/<br>-0.05  |
| ZON in newborn stool        | 118.70 (50.97-505.51)<br>n=58 | 107.83 (29.38-593.72)<br>n=8  | 0.992/<br>0.001  |
| ZON in umbilical-cord serum | 11.07 (5.82-52.34)<br>n=70    | 14.11 (7.47-22.15)<br>n=7     | 0.199/<br>-0.15  |
| ZON in maternal serum       | 21.40 (6.39-57.54)<br>n=67    | 18.13 (11.99-44.90)<br>n=9    | 0.930/<br>-0.01  |
| ZON in maternal stool       | 80.11 (42.52-225.74)<br>n=23  | 100.13 (78.24-188.70)<br>n=5  | 0.472/<br>-0.14  |

p - statistical significance, r-effect size

**Supplemental Table 2.** Calprotectin concentrations (CALP,  $\mu\text{g/ml}$ ) in women: overweight. with obesity and underweight.

| BMI before pregnancy   | $\leq 18.5$                   | $> 18.5$                      |             |
|------------------------|-------------------------------|-------------------------------|-------------|
|                        | Median<br>(range)             | Median<br>(range)             | p/r         |
| CALP in meconium       | 121.60 (6.93-538.91)<br>n=9   | 154.76 (7.48-884.11)<br>n=64  | 0.445/0.09  |
| CALP in newborn stool  | 76.66 (35.76-286.87)<br>n=10  | 140.00 (23.27-627.35)<br>n=59 | 0.512/0.08  |
| CALP in maternal stool | 14.60 (13.26-179.82)<br>n=3   | 74.79 (3.89-211.77)<br>n=17   | 0.459/0.17  |
| BMI before pregnancy   | $\leq 25$                     | $> 25$                        |             |
| CALP in meconium       | 145.07 (6.93-884.11)<br>n=50  | 166.99 (7.48-866.24)<br>n=23  | 0.098/-0.19 |
| CALP in newborn stool  | 120.82 (26.58-627.35)<br>n=47 | 151.30 (23.27-571.09)<br>n=22 | 0.274/-0.13 |
| CALP in maternal stool | 74.79 (3.89-211.77)<br>n=13   | 58.49 (17.60-119.25)<br>n=7   | 0.812/0.05  |
| BMI before pregnancy   | $\leq 30$                     | $> 30$                        |             |
| CALP in meconium       | 152.16 (6.93-884.11)<br>n=63  | 197.82 (82.45-737.25)<br>n=10 | 0.165/-0.16 |
| CALP in newborn stool  | 140.17 (23.27-627.35)<br>n=60 | 120.09 (44.83-203.04)<br>n=9  | 0.454/0.09  |
| CALP in maternal stool | 80.12 (3.89-211.77)<br>n=17   | 24.31 (18.00-58.49)<br>n=3    | 0.290/0.24  |

p - statistical significance, r-effect size

**Supplemental Table 3.** Zonulin concentrations (ZON, ng/ml) according to mother's mass increase during pregnancy.

| Mother's mass increase during pregnancy | <12 kg                      | 12-18 kg                      | >18 kg                       | p/epsilon-squared |
|-----------------------------------------|-----------------------------|-------------------------------|------------------------------|-------------------|
|                                         | Median (range)              | Median (range)                | Median (range)               |                   |
| ZON in meconium                         | 46.17 (1.93-124.01)<br>n=11 | 87.99 (7.96-700.65)<br>n=20   | 57.25 (1.36-148.24)<br>n=17  | 0.290/<br>0.05    |
| ZON in newborn stool                    | 110.42 (29.38-593.72) n=19  | 129.67 (55.03-505.51)<br>n=26 | 105.23 (50.7-369.08)<br>n=19 | 0.377/<br>0.03    |
| ZON in umbilical-cord serum             | 10.58 (6.86-25.06)<br>n=17  | 11.17 (7.66-52.34)<br>n=32    | 11.12 (5.82-47.92)<br>n=25   | 0.411/<br>0.02    |
| ZON in maternal stool                   | 100.13 (75.93-188.70) n=7   | 111.29 (54.54-225.74)<br>n=13 | 57.25 (42.52-208.20)<br>n=9  | 0.030+/<br>0.025  |
| ZON in maternal serum                   | 21.37 (10.26-40.74)<br>n=17 | 21.49 (6.39-42.98)<br>n=30    | 21.95 (9.28-57.54)<br>n=27   | 0.935/<br>0.002   |

† <12 vs 12-18: p=1.0; <12 vs >18: p=0.074; 12-18 vs >18: 0.056 (post-hoc test), p - statistical significance, epsilon-squared – effect size

**Supplemental Table 4.** Calprotectin concentrations (CALP,  $\mu\text{g/ml}$ ) according to mother's mass increase during pregnancy.

| Mother's mass increase during pregnancy | <12 kg                       | 12-18 kg                      | >18 kg                        | p/epsilon-squared |
|-----------------------------------------|------------------------------|-------------------------------|-------------------------------|-------------------|
|                                         | Median (range)               | Median (range)                | Median (range)                |                   |
| CALP in meconium                        | 132.13 (7.48-733.43)<br>n=20 | 157.90 (6.93-866.24)<br>n=29  | 152.16 (11.74-884.11)<br>n=23 | 0.450/<br>0.02    |
| CALP in newborn stool                   | 95.86 (11.89-280.87)<br>n=19 | 128.27 (35.76-627.35)<br>n=28 | 151.50 (26.58-571.09)<br>n=21 | 0.216/<br>0.05    |
| CALP in maternal stool                  | 18.00 (17.60-24.31)<br>n=3   | 46.36 (3.89-161.21)<br>n=10   | 98.75 (74.79-211.77)<br>n=7   | 0.031+/<br>0.37   |

† <12 vs 12-18:  $p=0.877$ ; <12 vs >18:  $p=0.047$ ; 12-18 vs >18:  $p=0.145$ ; +- test post-hoc; p - statistical significance, epsilon-squared – effect size

**Supplemental Table 5.** Zonulin concentrations (ZON, ng/ml) according to mother's BMI increase during pregnancy.

| Mother's BMI change         | >5.7                          | ≤5.7                          |                 |
|-----------------------------|-------------------------------|-------------------------------|-----------------|
|                             | Median<br>(range)             | Median<br>(range)             | p/r             |
| ZON in meconium             | 47.38 (1.36-309.20)<br>n=24   | 63.53 (1.93-700.65)<br>n=27   | 0.210/<br>-0.18 |
| ZON in newborn stool        | 107.30 (50.97-505.51)<br>n=28 | 133.51 (29.38-593.72)<br>n=38 | 0.215/<br>-0.15 |
| ZON in umbilical-cord serum | 11.16 (5.82-47.92)<br>n=38    | 11.14 (6.86-52.34)<br>n=39    | 0.752/<br>-0.04 |
| ZON in maternal serum       | 21.95 (9.28-57.54)<br>n=37    | 21.37 (6.39-42.98)<br>n=39    | 0.689/<br>0.05  |
| ZON in maternal stool       | 72.96 (42.52-225.74)<br>n=15  | 114.56 (75.93-188.70)<br>n=12 | 0.004/<br>-0.55 |

BMI – Body Mass Index, p - statistical significance, r-effect size,

**Supplemental Table 6.** Concentrations of calprotectin (CALP,  $\mu\text{g} / \text{ml}$ ) according to mother's BMI increase during pregnancy.

| Mother's BMI change    | >5.7                          | $\leq 5.7$                    |            |
|------------------------|-------------------------------|-------------------------------|------------|
|                        | Median<br>(range)             | Median<br>(range)             | p/r        |
| CALP in meconium       | 170.52 (11.74-884.11)<br>n=32 | 143.27 (6.93-737.25)<br>n=41  | 0.523/0.07 |
| CALP in newborn stool  | 153.35 (26.58-571.09)<br>n=32 | 113.67 (23.27-627.35)<br>n=37 | 0.030/0.26 |
| CALP in maternal stool | 98.75 (38.30-211.77)<br>n=11  | 18.00 (3.89-121.13)<br>n=9    | 0.003/0.66 |

BMI – Body Mass Index, p - statistical significance, r-effect size

**Supplemental Table 7.** Correlations between maternal BMI and zonulin concentrations (ZON).

| BMI                         | Before pregnancy | Before birth | BMI change   |
|-----------------------------|------------------|--------------|--------------|
| ZON in meconium             | R=0.14 n=51      | R=0.02 n=51  | R=-0.15 n=51 |
| p                           | 0.320            | 0.914        | 0.311        |
| ZON in newborn stool        | R=0.14 n=66      | R=0.08 n=66  | R=-0.10 n=66 |
| p                           | 0.279            | 0.532        | 0.442        |
| ZON in maternal stool       | R=0.03 n=28      | R=-0.25 n=28 | R=-0.63 n=27 |
| p                           | 0.892            | 0.197        | 0.0004       |
| ZON in maternal serum       | R=-0.21 n=76     | R=-0.14 n=76 | R=0.03 n=76  |
| p                           | 0.073            | 0.229        | 0.767        |
| ZON in umbilical-cord serum | R=0.11 n=77      | R=0.07 n=77  | R=-0.06 n=77 |
| p                           | 0.354            | 0.532        | 0.584        |

BMI – Body Mass Index, p - statistical significance, R- Spearman correlation coefficient

**Supplemental Table 8.** Correlations between maternal BMI and calprotectin concentrations (CALP).

| BMI                    | Before pregnancy        | Before birth           | BMI change             |
|------------------------|-------------------------|------------------------|------------------------|
| CALP in meconium       | R=0.21<br>p=0.068 n=73  | R=0.23<br>p=0.052 n=74 | R=0.05<br>p=0.645 n=73 |
| CALP in newborn stool  | R=0.07<br>p=0.552 n=69  | R=0.10<br>p=0.388 n=70 | R=0.15<br>p=0.215 n=69 |
| CALP in maternal stool | R=-0.07 n=20<br>p=0.779 | R=0.13 n=20<br>p=0.589 | R=0.59 n=20<br>p=0.006 |

BMI – Body Mass Index, R- Spearman correlation coefficient, p- statistical significance



**Supplemental Table 9.** Effect of birth weight on zonulin concentrations (ZON, ng/ml).

| Birth weight                | >15 percentile               | ≤15 percentile            |                 |
|-----------------------------|------------------------------|---------------------------|-----------------|
|                             | Median<br>(range)            | Median<br>(range)         | p/r             |
| ZON in umbilical-cord serum | 11.12 (5.82-47.92)<br>n=69   | 12.29 (7.48-52.34) n=10   | 0.621/<br>-0.06 |
| ZON in meconium             | 58.63 (1.36-700.65)<br>n=44  | 39.54 (8.14-148.24) n=8   | 0.630/<br>0.07  |
| ZON in newborn stool        | 121.16 (29.38-505.51) n=57   | 78.91 (55.03-593.72) n=11 | 0.150/<br>0.17  |
| ZON in maternal serum       | 20.98 (6.39-57.54) n=68      | 22.58 (11.09-42.98) n=10  | 0.525/<br>-0.07 |
| ZON in maternal stool       | 80.97 (42.52-208.20)<br>n=23 | 114.56 (56.81-225.74) n=6 | 0.247/<br>-0.21 |
| Birth weight                | ≥85 percentile               | ≤15 percentile            |                 |
| ZON in meconium             | 87.95 (7.40-122.11) n=6      | 28.91 (8.14-148.24) n=9   | 0.239/<br>-0.30 |
| ZON in newborn stool        | 114.50 (88.24-505.51) n=7    | 78.91 (55.03-593.72) n=11 | 0.085/<br>-0.41 |
| ZON in umbilical-cord serum | 10.63 (5.82-16.82) n=11      | 12.70 (7.48-52.34) n=11   | 0.168/<br>0.29  |
| ZON in maternal serum       | 21.37 (14.49-39.28) n=11     | 23.76 (11.09-42.98) n=11  | 0.555/<br>0.13  |

p - statistical significance, r-effect size

**Supplemental Table 10.** Effect of birth weight on calprotectin concentrations (CALP,  $\mu\text{g/ml}$ ).

| Birth weight           | >15 percentile                | $\leq$ 15 percentile          |             |
|------------------------|-------------------------------|-------------------------------|-------------|
|                        | Median<br>(range)             | Median<br>(range)             | p/r         |
| CALP in meconium       | 154.76 (6.93-884.11)<br>n=66  | 152.31 (11.43-733.43)<br>n=10 | 0.695/-0.04 |
| CALP in newborn stool  | 140.94 (11.89-627.35)<br>n=62 | 108.52 (35.76-178.07)<br>n=10 | 0.248/0.14  |
| CALP in maternal stool | 74.79 (3.89-211.77)<br>n=17   | 54.42 (13.26-121.13)<br>n=4   | 0.893/0.03  |
| Birth weight           | $\geq$ 85 percentile          | <15 percentile                |             |
| CALP in meconium       | 196.29 (11.74-884.11)<br>n=10 | 161.35 (11.43-733.43)<br>n=11 | 0.699/-0.08 |
| CALP in newborn stool  | 172.04 (49.76-518.81)<br>n=10 | 108.52 (35.76-178.07)<br>n=10 | 0.162/-0.31 |
| CALP in maternal stool | 74.79 (58.49-101.83)<br>n=3   | 54.42 (3.89-121.13)<br>n=5    | 0.551/-0.21 |

p - statistical significance. r-effect size
